# Supplementary material
Source: Springer Nature journal article supplement (https://www.springermedizin.de/resource/supplementary/12885_2005_259_MOESM1_ESM.pdf/9469398)

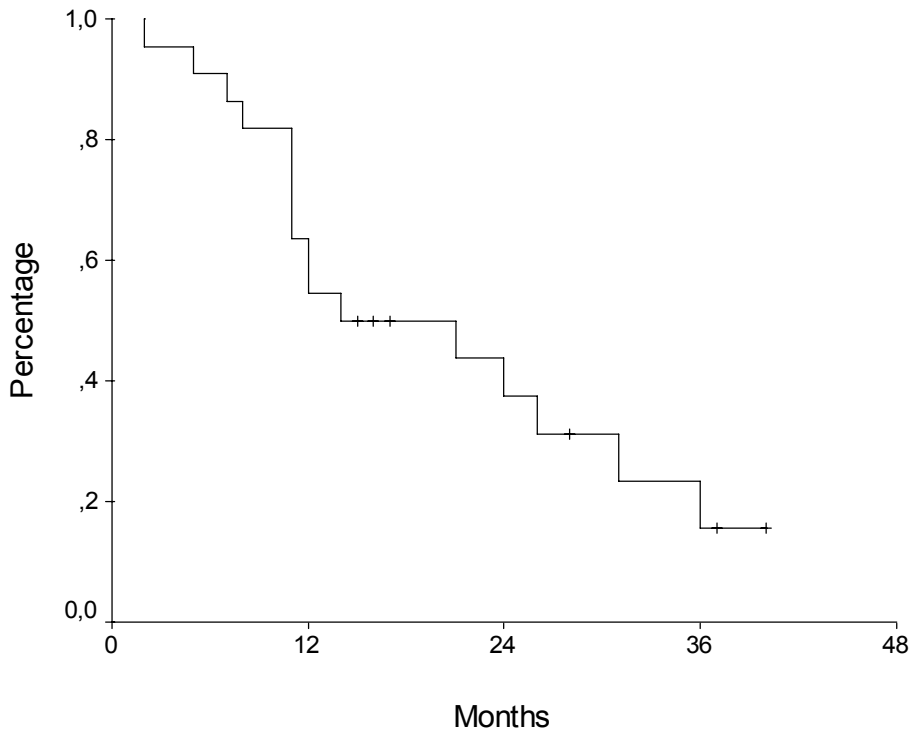

Supplement: MOESM1 [file 9469398]
